# Supplementary material for: Dinitrogen silylation catalyzed by silylene cobalt(i) and silylene iron(i) chlorides
Source: Royal Society of Chemistry journal article supplement (doi:10.1039/d4dt02057j), 2024-01-01
Supplement: d4dt02057j1.pdf [file d4dt02057j1.pdf]

## Supporting Information

### Dinitrogen silylation catalyzed by silylene cobalt(I) and silylene iron(I) chlorides

Qingqing Fan, Qingshuang Li, Hongjian Sun, Xiaoyan Li\*

*School of Chemistry and Chemical Engineering, Key Laboratory of Special Functional Aggregated Materials, Ministry of Education, Shandong University, Shanda Nanlu 27, 250100 Jinan, People's Republic of China*

Corresponding Authors

\*xli63@sdu.edu.cn

### Table of Contents

|                                                                                             |    |
|---------------------------------------------------------------------------------------------|----|
| 1. Crystallographic data for complexes <b>3</b> , <b>4</b> , <b>6</b> , <b>7</b>            | S2 |
| 2. IR, <sup>1</sup> H, <sup>13</sup> C and <sup>29</sup> Si NMR spectra of Ligand <b>L3</b> | S3 |
| 3. IR, <sup>31</sup> P NMR spectra of complexes <b>3</b> , <b>4</b> , <b>6</b> , <b>7</b>   | S5 |
| 4. The IR spectra of mechanism study                                                        | S9 |

**1. Table S1** Crystallographic data for complexes **3, 4, 6, 7**

|                                             | <b>3</b>                                                                                        | <b>4</b>                                                                                        | <b>6</b>                                                                                        | <b>7</b>                                                                                        |
|---------------------------------------------|-------------------------------------------------------------------------------------------------|-------------------------------------------------------------------------------------------------|-------------------------------------------------------------------------------------------------|-------------------------------------------------------------------------------------------------|
| formula                                     | C <sub>38</sub> H <sub>68</sub> Cl <sub>3</sub> CoN <sub>4</sub> P <sub>2</sub> Si <sub>2</sub> | C <sub>44</sub> H <sub>80</sub> Cl <sub>3</sub> CoN <sub>4</sub> P <sub>2</sub> Si <sub>2</sub> | C <sub>38</sub> H <sub>68</sub> Cl <sub>3</sub> FeN <sub>4</sub> P <sub>2</sub> Si <sub>2</sub> | C <sub>44</sub> H <sub>80</sub> Cl <sub>3</sub> FeN <sub>4</sub> P <sub>2</sub> Si <sub>2</sub> |
| <i>M</i> <sub>z</sub>                       | 864.36                                                                                          | 948.52                                                                                          | 861.28                                                                                          | 945.44                                                                                          |
| crystal system                              | monoclinic                                                                                      | monoclinic                                                                                      | monoclinic                                                                                      | monoclinic                                                                                      |
| space group                                 | P2 <sub>1</sub> /c                                                                              | P2 <sub>1</sub> /c                                                                              | P2 <sub>1</sub> /c                                                                              | I2/a                                                                                            |
| <i>a</i> /Å                                 | 13.65400(10)                                                                                    | 21.4451(2)                                                                                      | 13.6644(2)                                                                                      | 21.6307(4)                                                                                      |
| <i>b</i> /Å                                 | 20.1812(2)                                                                                      | 10.29200(10)                                                                                    | 20.2740(3)                                                                                      | 10.3205(2)                                                                                      |
| <i>c</i> /Å                                 | 16.8073(2)                                                                                      | 25.0566(3)                                                                                      | 16.7641(2)                                                                                      | 24.7701(5)                                                                                      |
| $\alpha$ /°                                 | 90                                                                                              | 90                                                                                              | 90                                                                                              | 90                                                                                              |
| $\beta$ /°                                  | 92.5000(10)                                                                                     | 108.3210(10)                                                                                    | 92.5530(10)                                                                                     | 111.412(2)                                                                                      |
| $\gamma$ /°                                 | 90                                                                                              | 90                                                                                              | 90                                                                                              | 90                                                                                              |
| V [Å <sup>3</sup> ]                         | 4626.91(8)                                                                                      | 5249.98(10)                                                                                     | 4639.58(11)                                                                                     | 5148.01(18)                                                                                     |
| T [K]                                       | 173.00(10)                                                                                      | 173.00(10)                                                                                      | 173.00(10)                                                                                      | 173.00(10)                                                                                      |
| Z                                           | 4                                                                                               | 4                                                                                               | 4                                                                                               | 4                                                                                               |
| $\mu$ [mm <sup>-1</sup> ]                   | 5.876                                                                                           | 5.221                                                                                           | 5.567                                                                                           | 5.060                                                                                           |
| total reflns                                | 40040                                                                                           | 39439                                                                                           | 36306                                                                                           | 17284                                                                                           |
| unique reflns                               | 9161                                                                                            | 10368                                                                                           | 9217                                                                                            | 4515                                                                                            |
| R <sub>int</sub>                            | 0.0494                                                                                          | 0.0473                                                                                          | 0.0495                                                                                          | 0.0605                                                                                          |
| R1 [ <i>I</i> >2 $\sigma$ ( <i>I</i> )]     | 0.0480                                                                                          | 0.0372                                                                                          | 0.0499                                                                                          | 0.0572                                                                                          |
| wR(F2) [ <i>I</i> >2 $\sigma$ ( <i>I</i> )] | 0.1273                                                                                          | 0.0944                                                                                          | 0.1381                                                                                          | 0.1657                                                                                          |
| R1(all data)                                | 0.0565                                                                                          | 0.0423                                                                                          | 0.0577                                                                                          | 0.0629                                                                                          |
| wR(F2) (all data)                           | 0.1316                                                                                          | 0.0973                                                                                          | 0.1439                                                                                          | 0.1710                                                                                          |
| GOF on F2                                   | 1.023                                                                                           | 1.035                                                                                           | 1.033                                                                                           | 1.073                                                                                           |

2. IR,  $^1\text{H}$ ,  $^{13}\text{C}$  and  $^{29}\text{Si}$  NMR spectra of ligand L3

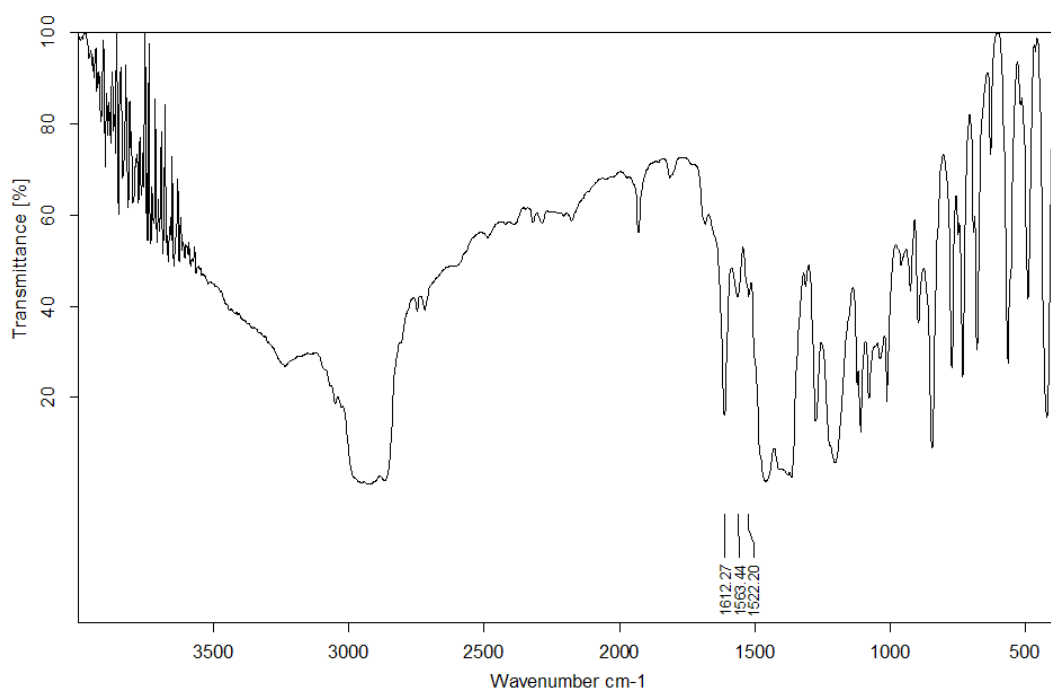

Figure S1. The IR Spectrum of ligand L3

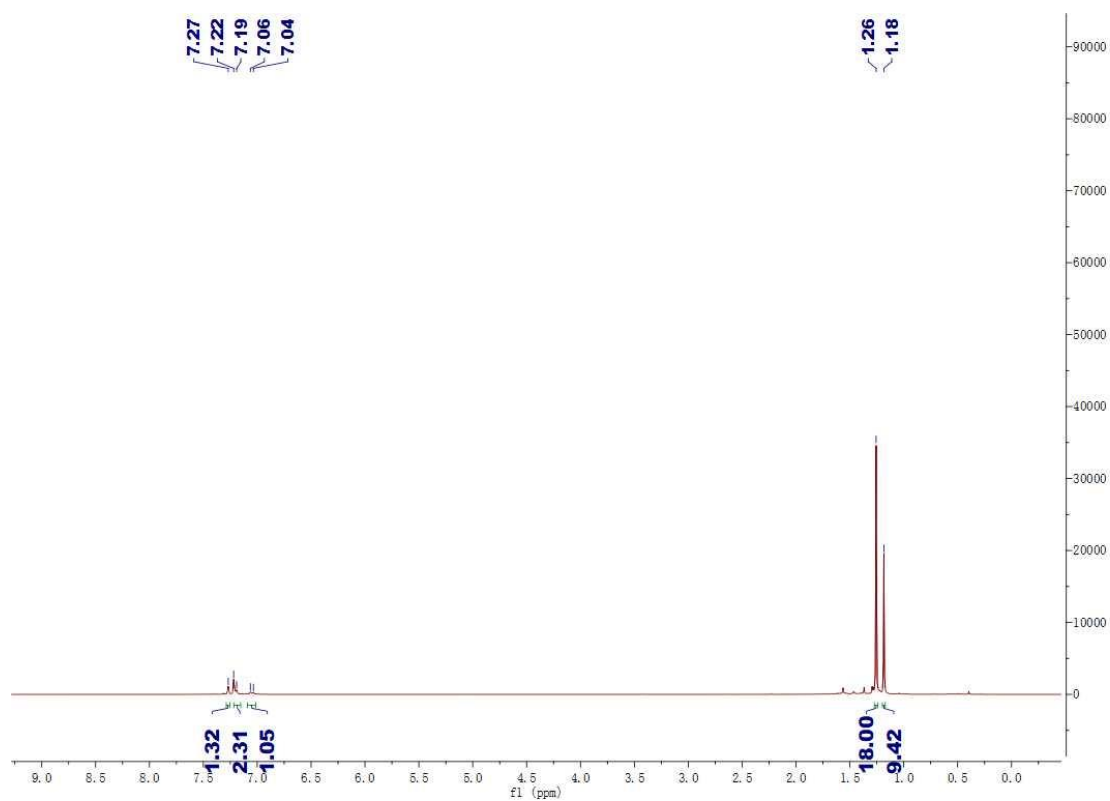

Figure S2. The  $^1\text{H}$  NMR spectrum of Ligand L3 in  $\text{C}_6\text{D}_6$

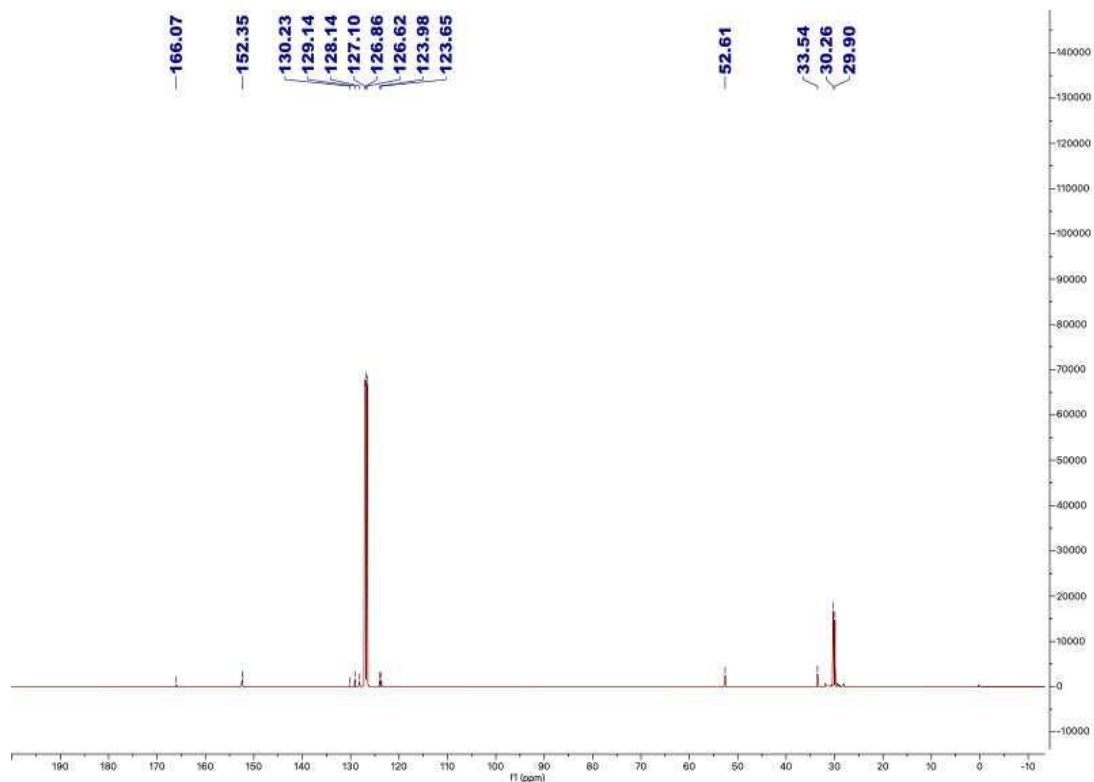

Figure S3. The  $^{13}\text{C}$  NMR spectrum of Ligand L3 in  $\text{C}_6\text{D}_6$

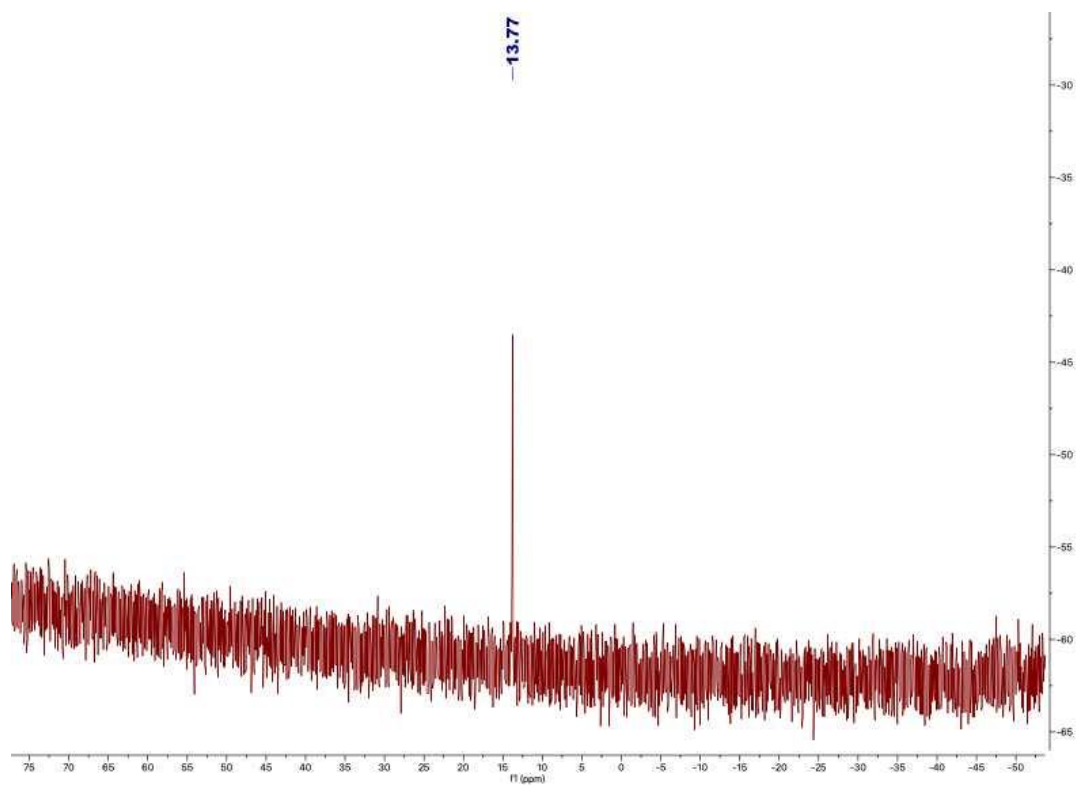

Figure S4. The  $^{29}\text{Si}$  NMR spectrum of Ligand L3 in  $\text{C}_6\text{D}_6$

3. IR,  $^{31}\text{P}$  NMR spectra of complexes **3**, **4**, **6**, **7**

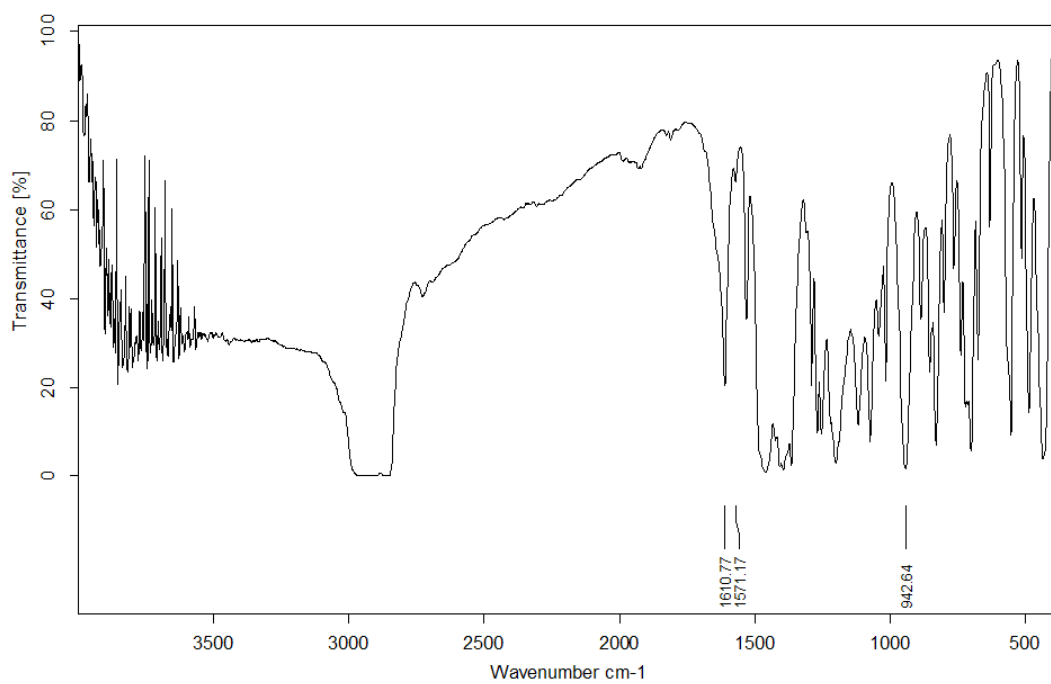

Figure S5. The IR Spectrum of complex **3**

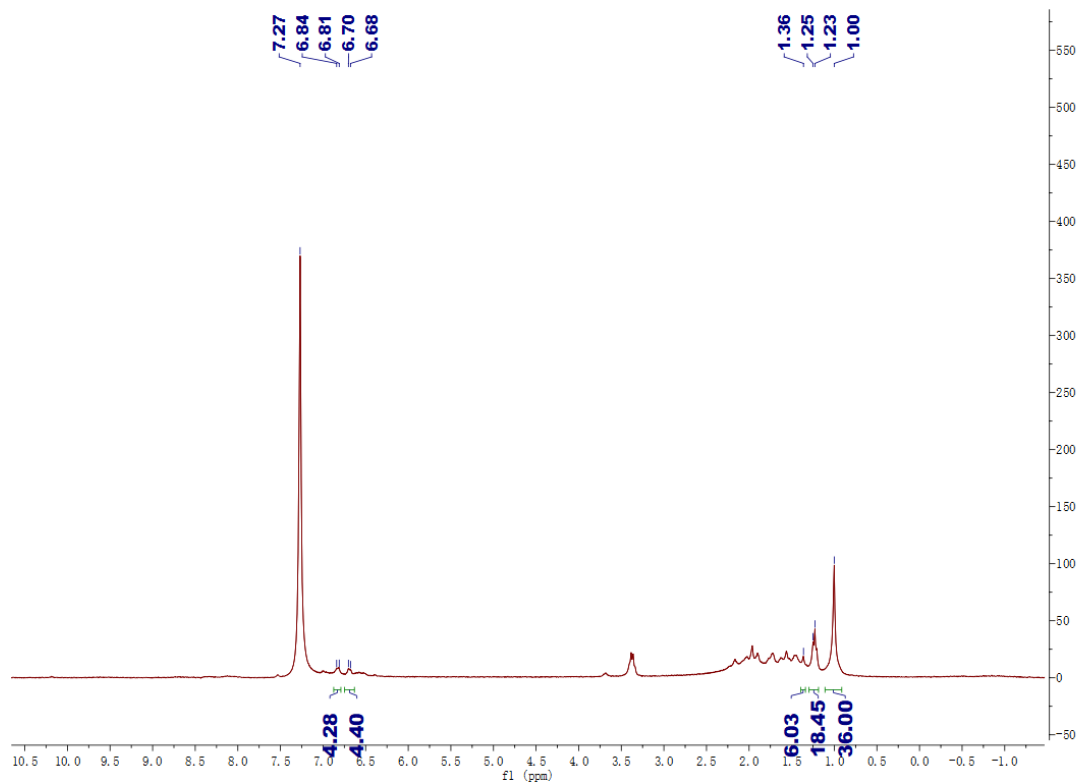

Figure S6. The  $^1\text{H}$  NMR spectrum of complex **3** in  $\text{C}_6\text{D}_6$

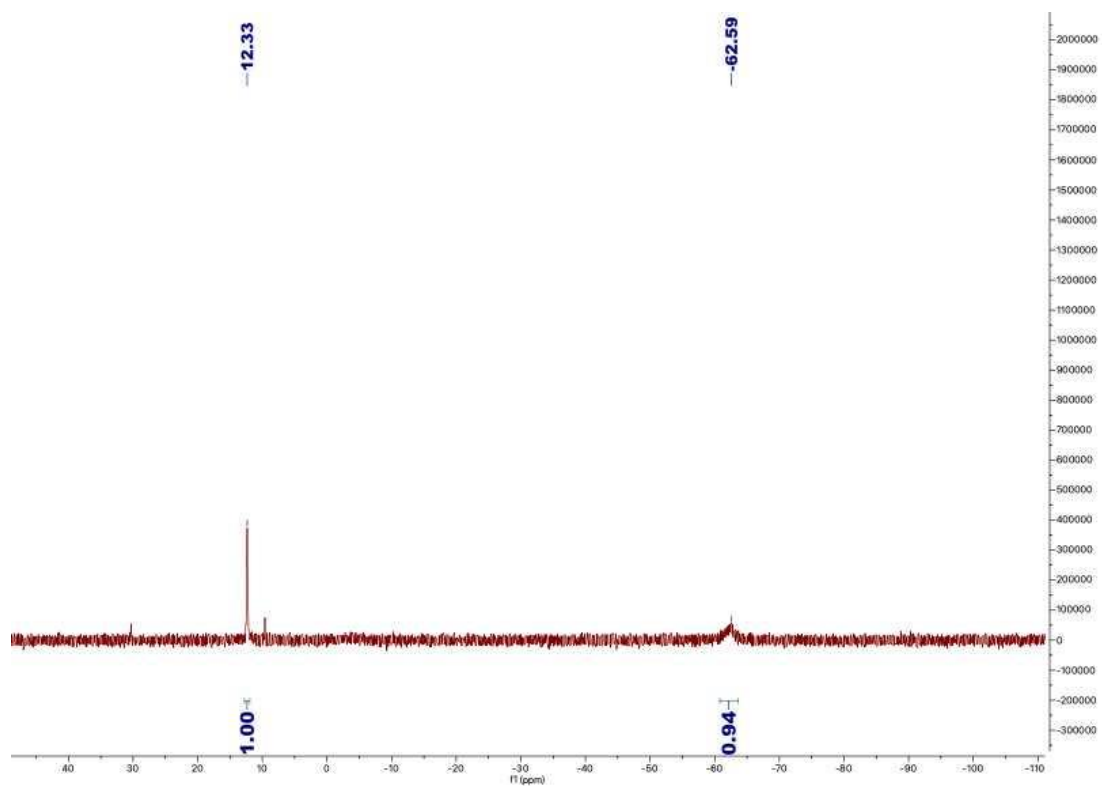

Figure S7. The  $^{31}\text{P}$  NMR spectrum of complex **3** in  $\text{C}_6\text{D}_6$

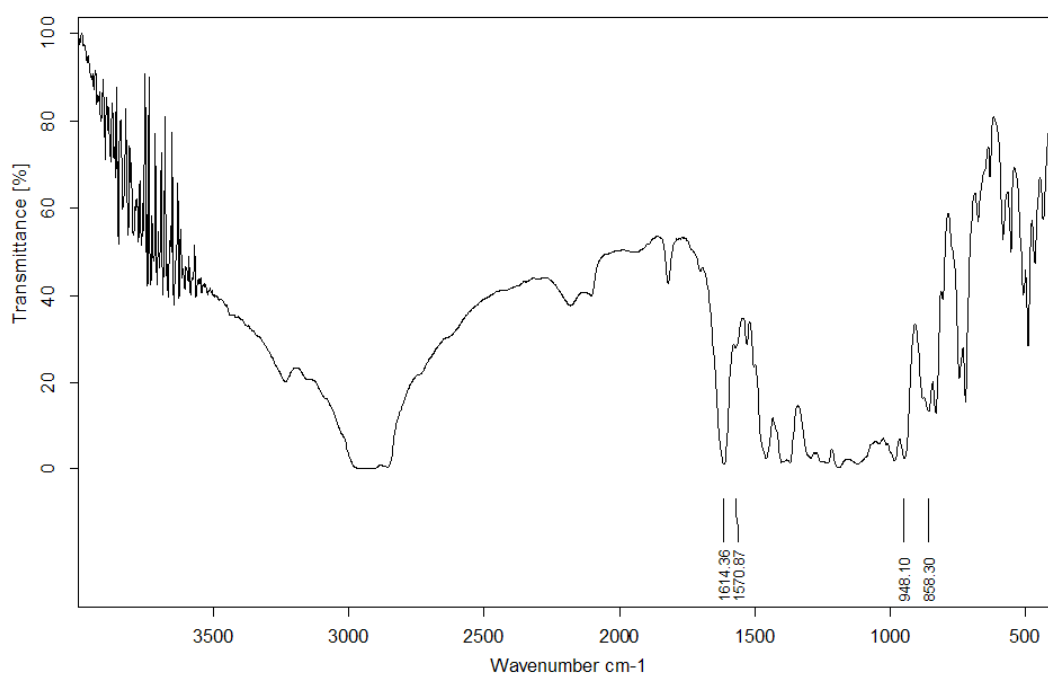

Figure S8. The IR Spectrum of complex **4**

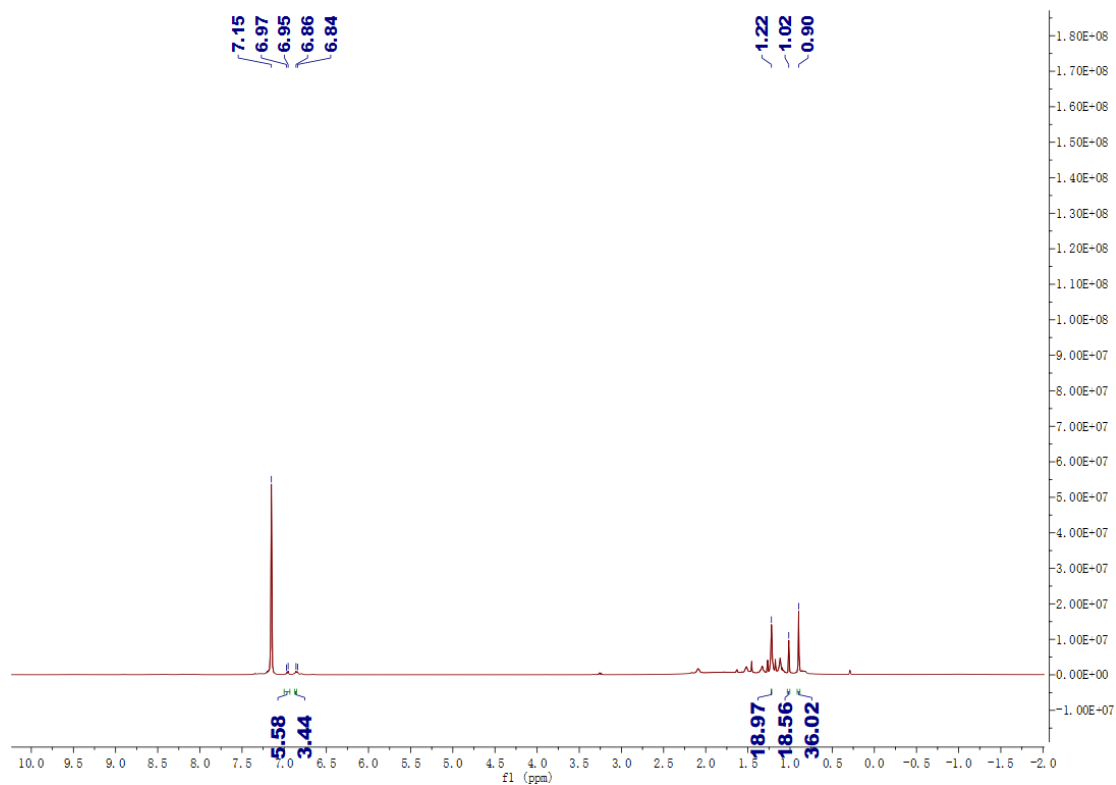

Figure S9. The  $^1\text{H}$  NMR spectrum of complex **4** in  $\text{C}_6\text{D}_6$

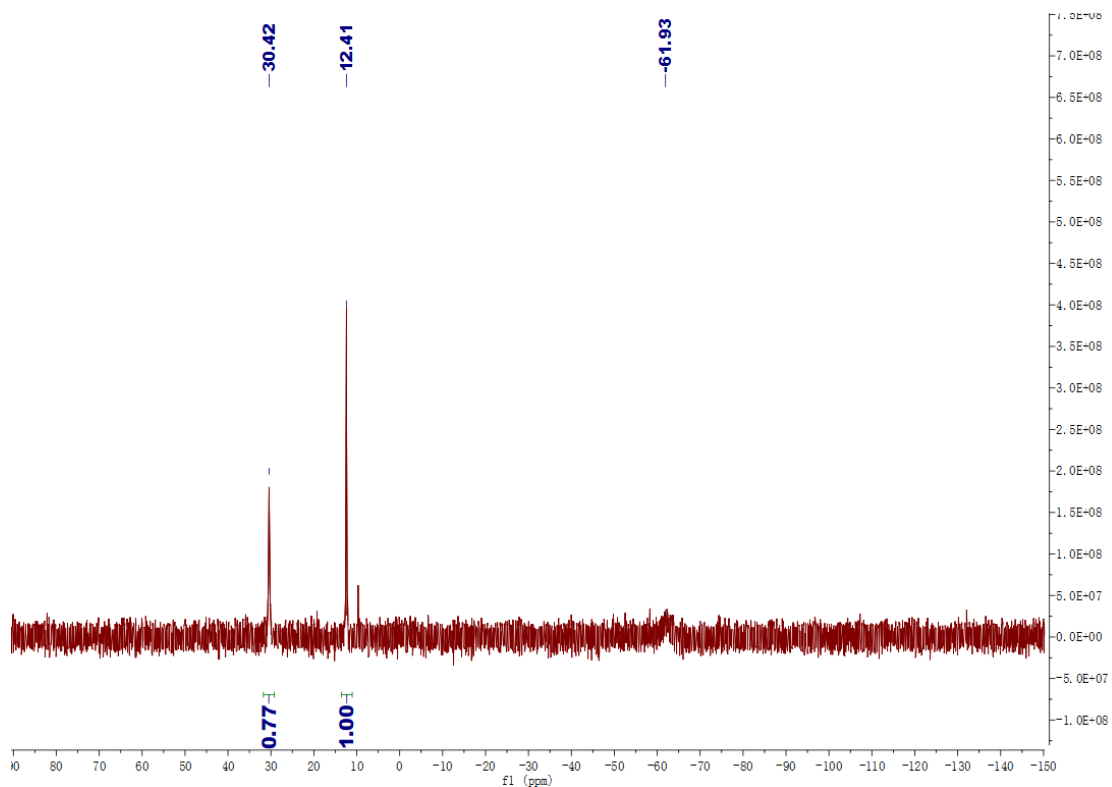

Figure S10. The  $^{31}\text{P}$  NMR spectrum of complex **4** in  $\text{C}_6\text{D}_6$

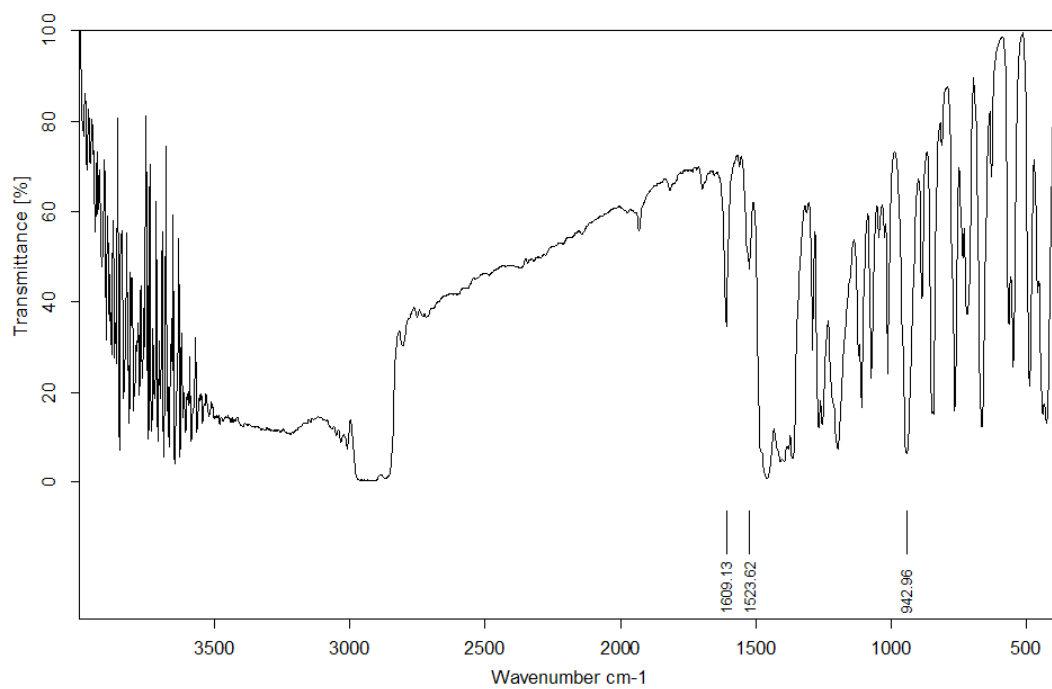

**Figure S11.** The IR Spectrum of complex 6

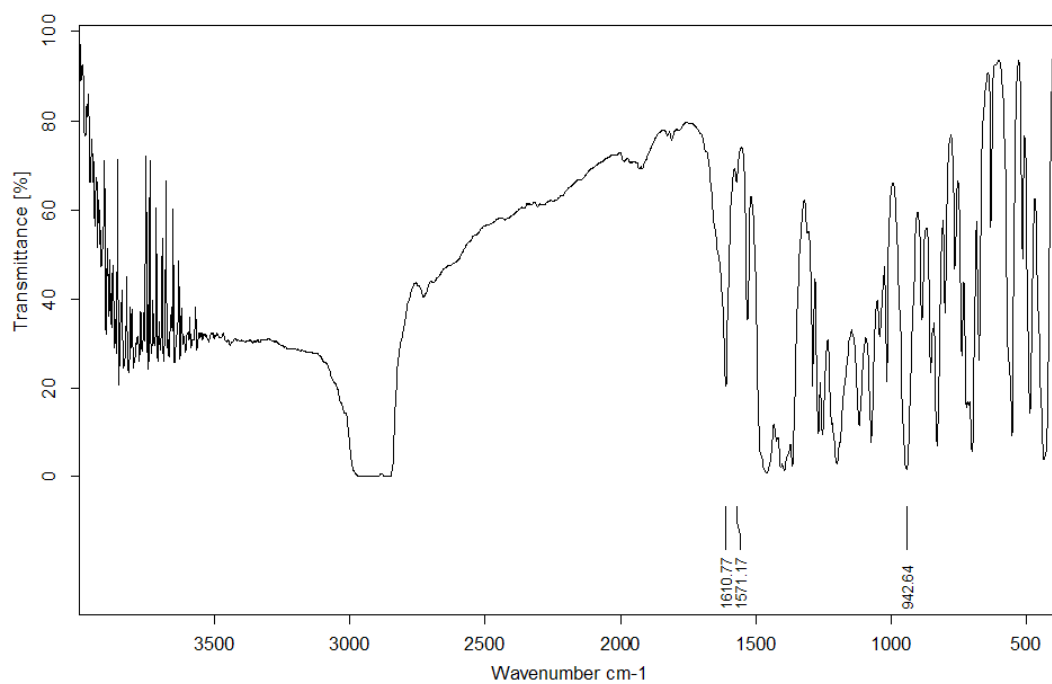

**Figure S12.** The IR Spectrum of complex 7



#### 4. The IR spectra of mechanism study

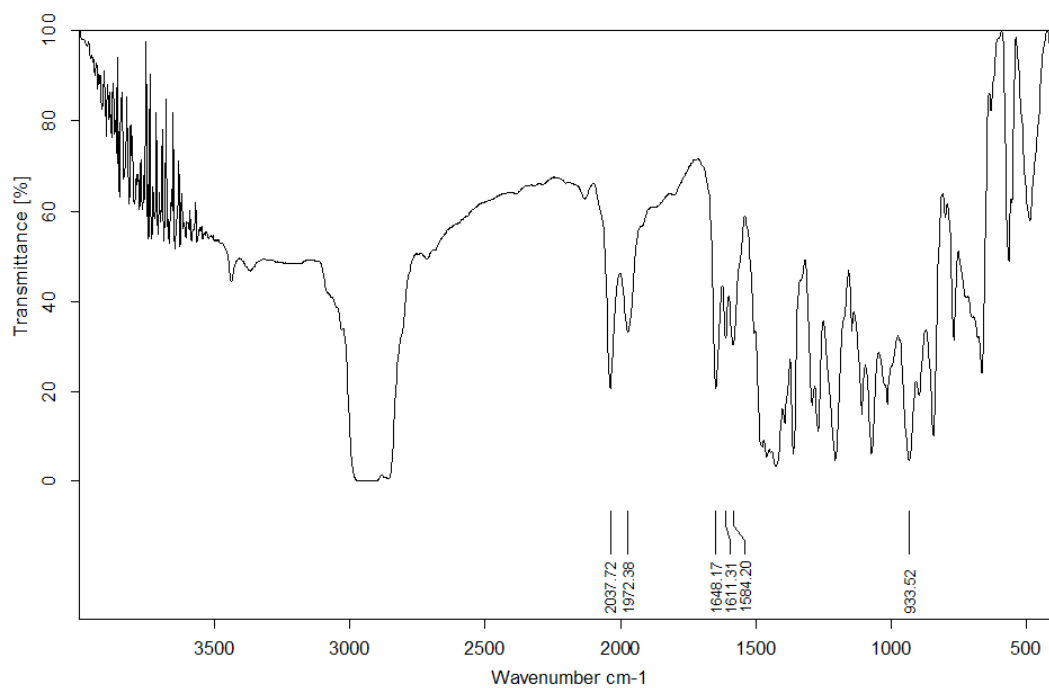

**Figure S13.** The IR Spectrum of stoichiometric reaction of **2** and KC<sub>8</sub> at -30°C for 6 h in THF.

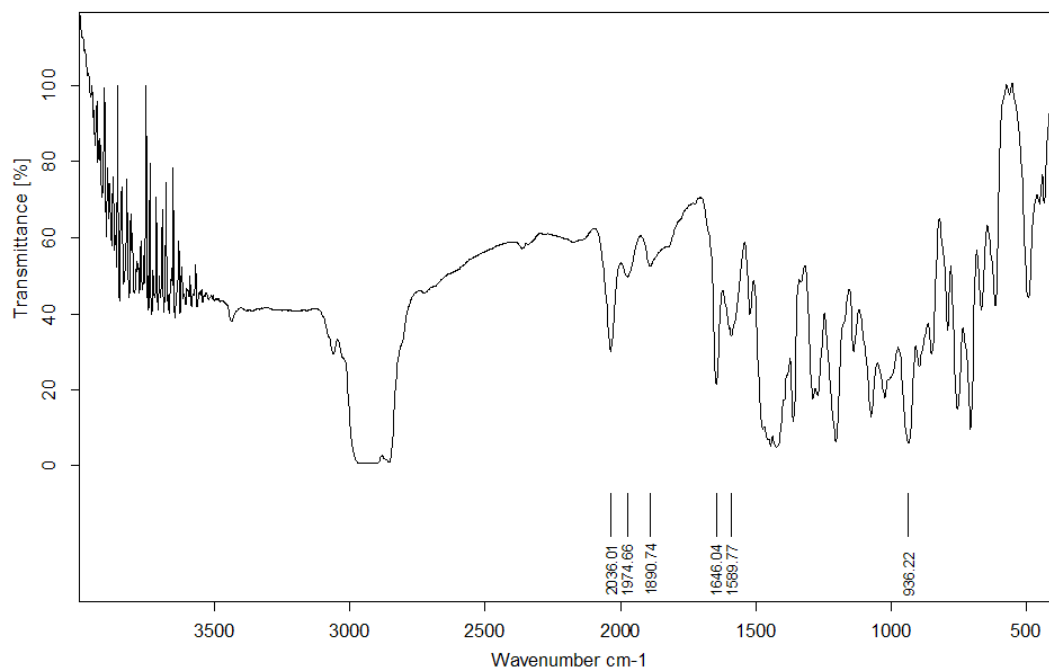

**Figure S14.** The IR Spectrum of stoichiometric reaction of **5** and KC<sub>8</sub> at 25°C for 10 h in THF.
